# Supplementary material for: Isolation, Phylogenetic and Gephyromycin Metabolites Characterization of New Exopolysaccharides-Bearing Antarctic Actinobacterium from Feces of Emperor Penguin
Source: MDPI journal article supplement (doi:10.3390/md19080458), 2021-08-12
Supplement: s1 [file s1]

# **Isolation, Phylogenetic and Gephyromycin Metabolites Characterization of New Exopolysaccharides-bearing Antarctic Actinobacterium from Feces of Emperor Penguin**

**Hui-Min Gao <sup>1</sup>, Peng-Fei Xie <sup>1,2</sup>, Xiao-Ling Zhang <sup>1,2,\*</sup> and Qiao Yang <sup>1,2,3 \*</sup>**

<sup>1</sup> College of Marine Science and Technology, Zhejiang Ocean University, Zhoushan 316022, China; gaohuimin@zjou.edu.cn (H.-M.G.); xiepengfei@zjou.edu.cn (P.-F.X.);

<sup>2</sup> ABI Group, Zhejiang Ocean University, Zhoushan 316022, China

<sup>3</sup> Department of Environment Science and Engineering, Zhejiang Ocean University, Zhoushan 316022, China

**\* Corresponding authors.**

E-mail addresses: zhangxiaoling@zjou.edu.cn (X.L.Z.); qiaoyang1979@whu.edu.cn (Q.Y.)

**Figure S1** Transmission electron microscopy (TEM) observation of the dividing cells of strain NJES-13 by binary fission with black arrows indicating the boundary of division. *Bar*, 1  $\mu\text{m}$

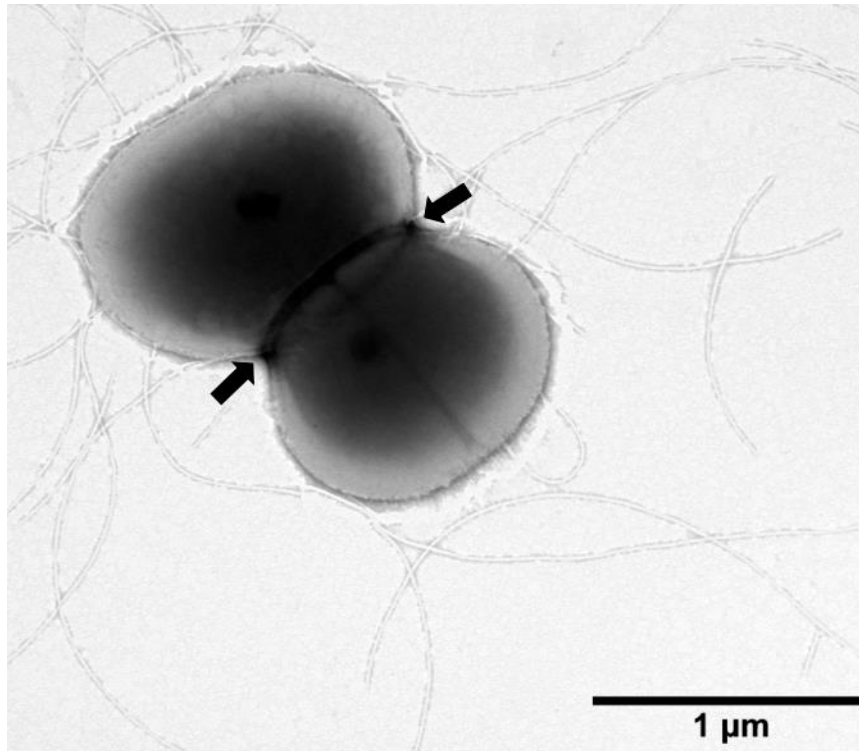

**Table S1** The  $^1\text{H}$  (400 MHz,  $\text{CDCl}_3$ ) and  $^{13}\text{C}$  NMR (151 MHz,  $\text{CDCl}_3$ ) data for compounds 1 and 2

| Compounds 1<br>(2-ydroxytetrangomycin) |                 | Compounds 2<br>(gephyromycin)     |                 |
|----------------------------------------|-----------------|-----------------------------------|-----------------|
| $^1\text{H}$                           | $^{13}\text{C}$ | $^1\text{H}$                      | $^{13}\text{C}$ |
| 13.65-12.98 (m, 1H),                   | 189.14,         | 11.45 (s, 1H),                    | 204.10,         |
| 12.86-12.41 (m, 1H),                   | 161.33,         | 7.62 (d, $J = 8.0$ Hz, 1H),       | 197.84,         |
| 8.11-7.76 (m, 1H),                     | 140.13,         | 7.58 (d, $J = 1.3$ Hz, 1H),       | 191.73,         |
| 7.74-7.62 (m, 1H),                     | 136.74,         | 7.30 (dd, $J = 8.2, 1.3$ Hz, 1H), | 161.61,         |
| 7.26 (s, 2H),                          | 126.09,         | 4.74-4.47 (m, 2H),                | 136.01,         |
| 5.73-4.93 (m, 1H),                     | 118.80,         | 2.58 (d, $J = 6.7$ Hz, 2H),       | 132.41,         |
| 3.31-2.91 (m, 2H),                     | 115.94,         | 2.34 (d, $J = 2.5$ Hz, 3H),       | 124.26,         |
| 2.87-2.42 (m, 2H),                     | 77.16,          | 2.15-2.02 (m, 1H),                | 118.83,         |
| 2.50-2.16 (m, 2H),                     | 76.95,          | 1.97 (d, $J = 14.7$ Hz, 1H),      | 115.05,         |
| 2.14-1.81 (m, 1H),                     | 76.81,          | 1.89-1.78 (m, 2H),                | 79.67,          |
| 1.56-1.10 (m, 11H),                    | 72.16,          | 1.23 (s, 3H)                      | 70.82,          |
| 1.10-0.61 (m, 4H)                      | 36.94,          |                                   | 46.35,          |
|                                        | 28.84,          |                                   | 29.28,          |
|                                        | 22.67           |                                   | 25.02           |

**Table S2** Genes numbers of the functional categories of COGs based on the genomic sequence of strain NJES-13

| Functional group |                                                               | Gene<br>number | Gene<br>ratio, % |
|------------------|---------------------------------------------------------------|----------------|------------------|
| A                | RNA processing and modification                               | 1              | 0.05             |
| C                | Energy production and conversion                              | 147            | 6.69             |
| D                | Cell cycle control, cell division, chromosome partitioning    | 19             | 0.86             |
| E                | Amino acid transport and metabolism                           | 205            | 9.33             |
| F                | Nucleotide transport and metabolism                           | 66             | 3.00             |
| G                | Carbohydrate transport and metabolism                         | 157            | 7.15             |
| H                | Coenzyme transport and metabolism                             | 122            | 5.55             |
| I                | Lipid transport and metabolism                                | 102            | 4.64             |
| J                | Translation, ribosomal structure and biogenesis               | 152            | 6.92             |
| K                | Transcription                                                 | 148            | 6.74             |
| L                | Replication, recombination and repair                         | 110            | 5.01             |
| M                | Cell wall/membrane/envelope biogenesis                        | 125            | 5.69             |
| N                | Cell motility                                                 | 15             | 0.68             |
| O                | Posttranslational modification, protein turnover, chaperones  | 72             | 3.28             |
| P                | Inorganic ion transport and metabolism                        | 149            | 6.78             |
| Q                | Secondary metabolites biosynthesis, transport and catabolism  | 49             | 2.23             |
| R                | General function prediction only                              | 261            | 11.88            |
| S                | Function unknown                                              | 143            | 6.51             |
| T                | Signal transduction mechanisms                                | 80             | 3.64             |
| U                | Intracellular trafficking, secretion, and vesicular transport | 27             | 1.23             |
| V                | Defense mechanisms                                            | 47             | 2.14             |
